# Supplementary material
Source: MDPI journal article supplement (https://www.mdpi.com/2311-5637/8/1/34)
Supplement: s1 [file s1 › fermentation-1504134-supplementary.pdf]

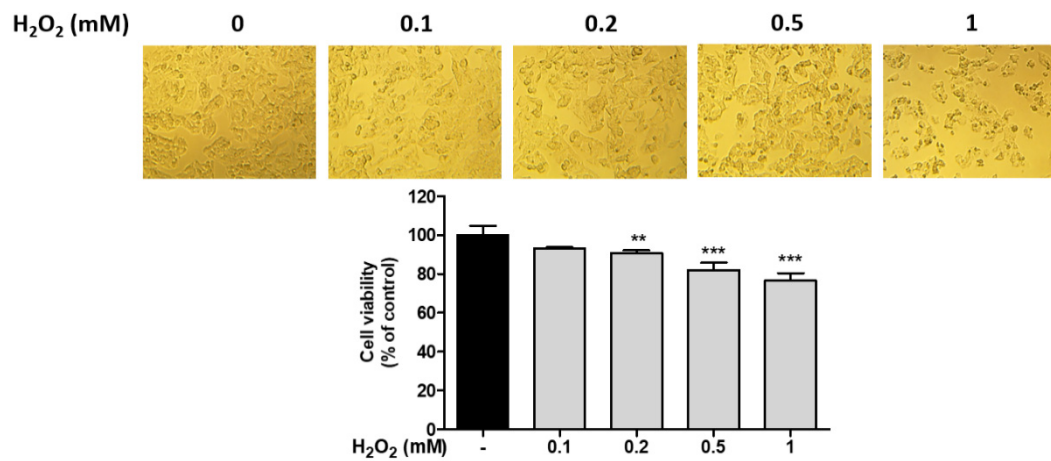

**Figure S1.** Effect of  $\text{H}_2\text{O}_2$  on HepG2 cells viability. Cells were treated with different concentrations of the  $\text{H}_2\text{O}_2$  (0.1, 0.2, 0.5, and 1 mM) for 24 h. Values are presented as mean  $\pm$  SEM ( $n = 3$ ). Significantly differences were determined by Duncan's multiple range tests (\*\* $p < 0.01$ , and \*\*\* $p < 0.001$ ).
